# Supplementary material for: IgG3 collaborates with IgG1 and IgA to recruit effector function in RV144 vaccinees
Source: JCI journal article supplement (doi:10.1172/jci.insight.140925), 2020-10-08
Supplement: sd1 [file 1]

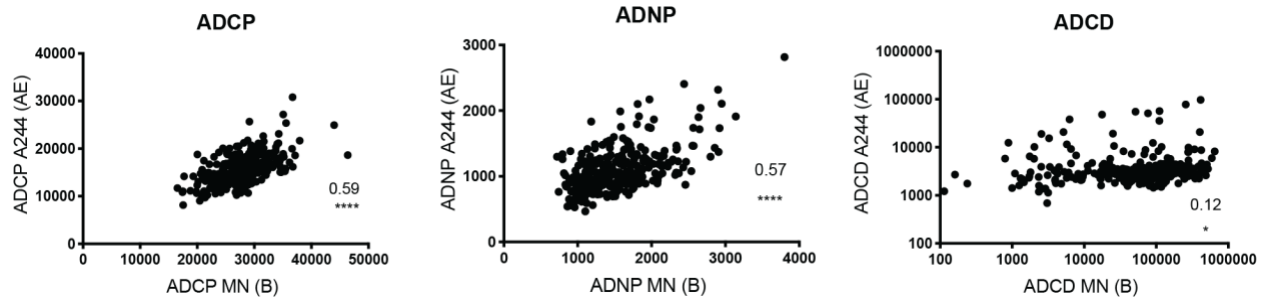

**Supplemental Figure 1: Correlation between gp120 MN and A244 in effector functions.** The correlation plots show Spearman correlations for ADCP, ADNP and ADCD between gp120 MN (Clade B) and gp120 A244 (Clade AE) antigens. The Spearman r value is indicated as well as the p value, \* $p < 0.05$ , \*\*\* $p < 0.001$ , \*\*\*\* $p < 0.0001$ .
